# Supplementary material
Source: Springer Nature journal article supplement (https://www.springermedizin.de/resource/supplementary/12936_2012_2163_MOESM1_ESM.pdf/9542698)
Supplement: MOESM1 [file 9542698]

**FREQUENCY**

*Permanent*

**alter receptivity**

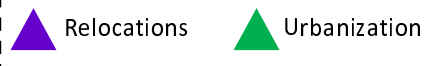

**introduce infections,  
threaten national  
elimination**

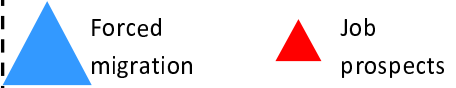

*Seasonal*

**introduce infections,  
threaten control and  
local elimination**

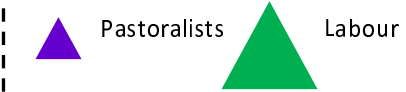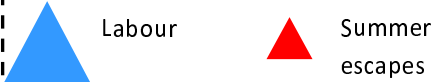

*Return*

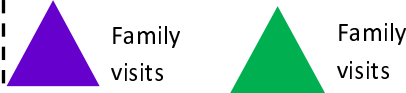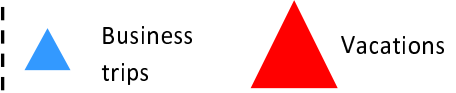

*Routine*

**exposure to infection**

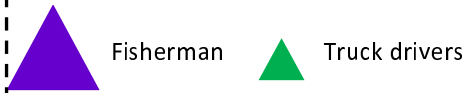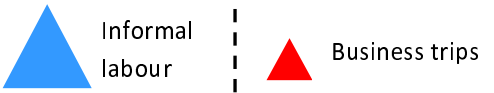

*Between rural areas*

*Between rural and urban areas*

*Contiguous international*

*Non-contiguous international*

**DISTANCE**
